# Supplementary material
Source: Springer Nature journal article supplement (https://www.springermedizin.de/resource/supplementary/12891_2005_235_MOESM1_ESM.pdf/9510804)
Supplement: MOESM1 [file 9510804]

# Salisbury Priority Scoring System:

## Progress of disease

- 0 Static
- 1 Benign, insignificant progress
- 2 Progressive disease; outcome unlikely to be affected by delay
- 3 Progressive disease; outcome probably affected by delay
- 4 Rapidly progressive disease; outcome made poorer by delay

## Pain or distress

- 0 No pain or distress
- 1 Occasional pain controlled by mild analgesics; mild concern adequately handled
- 2 Intermittent pain controlled by strong analgesics; anxiety disturbing patients family or friends
- 3 Constant but controlled pain; worry affecting patient, family or friends
- 4 Severe pain uncontrolled by analgesics; major distress to patient, family or friends

## Disability or dependence on others

- 0 No loss of function or dependence on others
- 1 Occasional loss of function; help occasionally needed
- 2 Intermittent or mild function loss; help intermittently needed
- 3 Significant disability interfering with daily living; substantially dependent on others
- 4 Substantial disability interfering with daily living; substantially dependent on others

## Interference with usual occupation

- 0 No interference with usual occupation
- 1 Occasional interference with usual occupation
- 2 Intermittent interference with usual occupation
- 3 Regular interference with usual occupation
- 4 Unable to pursue usual occupation
